# Supplementary material for: Optimizing event-driven spiking neural network with regularization and cutoff
Source: Frontiers journal article supplement (doi:10.3389/fnins.2025.1522788), 2025-02-19
Supplement: Data_Sheet_1.pdf [file Data_Sheet_1.pdf]

# Optimising Event-Driven Spiking Neural Network with Regularisation and Cutoff: Supplementary Material

## 1 INEQUATION PROOF

We follow Banner et al. (2018) to derive the bound of expected norm of a random variable vector. By Jensen's inequality, it gives

$$\begin{aligned}\mathbb{E}(\|\mathbf{V}(t)\|_2) &= \mathbb{E}\left(\sqrt{\sum_i V_i(t)^2}\right) \leq \sqrt{\mathbb{E}\left(\sum_i V_i(t)^2\right)} \\ &= \sqrt{\sum_i \mathbb{E}(V_i(t)^2)}\end{aligned}\tag{S1}$$

As the  $V_i(t)$  is a uniform random variable in range  $[0, V_{\text{thr}}]$ , the expected value of  $V_i^2(t)$  can be computed as follows

$$\mathbb{E}(V_i(t)^2) = \int_0^{V_{\text{thr}}} x^2 \frac{1}{V_{\text{thr}}} dx = \frac{V_{\text{thr}}^2}{3}\tag{S2}$$

which yields

$$\mathbb{E}(\|\mathbf{V}(t)\|_2) \leq \frac{\sqrt{n}V_{\text{thr}}}{\sqrt{3}}\tag{S3}$$

Since  $t$  is constant value, the following inequality holds

$$\mathbb{E}(\|\mathbf{V}(t)/t\|_2) \leq \frac{\sqrt{n}V_{\text{thr}}}{\sqrt{3}t}\tag{S4}$$

## 2 SUMMARY OF NOTATIONS.

### REFERENCES

Banner, R., Hubara, I., Hoffer, E., and Soudry, D. (2018). Scalable methods for 8-bit training of neural networks. *Advances in Neural Information Processing Systems* 31

| Symbol                         | Definition                                                |
|--------------------------------|-----------------------------------------------------------|
| $l$                            | Layer index                                               |
| $L$                            | Total number of layers                                    |
| $i$                            | Element index                                             |
| $t$                            | Discrete timestep                                         |
| $T$                            | Maximum timestep                                          |
| $T_{avg}$                      | The average number of timesteps                           |
| $\mathbf{W}$                   | Weight matrix                                             |
| $V^-$                          | Membrane potential before reset                           |
| $V^+$                          | Membrane potential after reset                            |
| $\mathbf{Z}$                   | Weighted current                                          |
| $\theta$                       | Step function                                             |
| $V_{thr}$                      | Threshold voltage                                         |
| $\mathbf{b}$                   | Bias current                                              |
| $\mathbf{X}$                   | Event input                                               |
| $\bar{\mathbf{X}}_f$           | Constant input current                                    |
| $\mathbf{Z}_e^1$               | Output of the 1 <sup>st</sup> layer for event-based input |
| $\mathbf{Z}_f^1$               | Output of the 1 <sup>st</sup> layer for frame-based input |
| $OCT(\cdot)$                   | Optimal Cutoff Timestep (OCT) function                    |
| $\hat{t}$                      | Conditional discrete timestep                             |
| $f(\cdot)$                     | SNN prediction function                                   |
| $Top_k(\cdot)$                 | Top- $k$ function                                         |
| $\mathbf{Y}$                   | Vector of output digits                                   |
| $D$                            | Set of inputs                                             |
| $Y_{gap}$                      | Gap between top-1 and top-2 output values                 |
| $\beta$                        | Threshold to trigger cutoff                               |
| $D\{Y_{gap} > \beta_t\}$       | Set of inputs satisfying $Y_{gap} > \beta$                |
| $C(t, D\{Y_{gap} > \beta_t\})$ | Confidence rate at $t$ with $Y_{gap} > \beta$ condition   |
| $\epsilon$                     | Pre-specified constant                                    |
| $\mathbf{r}$                   | Average spiking rate                                      |
| $\tilde{\mathbf{r}}$           | Desired spike rate                                        |
| $\ \cdot\ _2$                  | L2 norm                                                   |
| $n$                            | number of elements of a vector                            |
| $\mathbf{a}$                   | ReLU activation in ANN                                    |
| $\mathbf{r}_c$                 | Spiking rate (ANN-to-SNN conversion)                      |
| $\tilde{\mathbf{r}}_c$         | Desired spiking rate (ANN-to-SNN conversion)              |
| $\Delta$                       | Residual spiking rate (ANN-to-SNN conversion)             |
| $\mathbf{r}_d$                 | Spiking rate (direct training)                            |
| $\tilde{\mathbf{r}}_d$         | Desired spiking rate (direct training)                    |
| $N$                            | Integer hyperparameter to estimate $\tilde{\mathbf{r}}_d$ |
| $L_{CE}$                       | Cross-entropy loss                                        |
| $L_{RCS}$                      | Regulariser of Cosine Similarity loss                     |
| $\alpha$                       | Hyperparameter to balance loss terms                      |
